# Supplementary material
Source: PubMed Central journal article supplement (PMC4826290)
Supplement: NIHMS762094-supplement.pdf [file NIHMS762094-supplement.pdf]

**Table S1.** Sequences (5'-3') of the oligonucleotides used in this work.

|                                                 |                                                                                  |
|-------------------------------------------------|----------------------------------------------------------------------------------|
| P                                               | CCGCCGCGGAAC TTATTAGTG                                                           |
| T <sub>1</sub>                                  | GTGACGGTGTGTGGGTGTGAATCTCACTAATAAGTTCCGCGGCGG                                    |
| D <sub>18</sub>                                 | T <sub>10</sub> GATTCACACCCACACACC                                               |
| D <sub>23</sub>                                 | T <sub>10</sub> GATTCACACCCACACACCGTCAC                                          |
| D <sub>30</sub>                                 | T <sub>10</sub> GATTCACACCCACACACCGTCACCATCGAC                                   |
| D <sub>40</sub>                                 | T <sub>10</sub> GATTCACACCCACACACCGTCACCATCGACTCAAGCAATC                         |
| T <sub>2</sub>                                  | TGGCGACGGCAGCGAGGCGTGACACACCCACACACCGAATCTCACTAATAAGTTCCGCGGCGG                  |
| C <sub>23</sub> <sup>*</sup>                    | T <sub>5</sub> GATTCGGTGTGTGGGTGTGTGCAC-Cy3                                      |
| H <sub>18</sub>                                 | GCCTCGCTGCCGTCGCCA                                                               |
| H <sub>18</sub> <sup>*</sup>                    | CY5-GCCTCGCTGCCGTCGCCA                                                           |
| D <sub>18</sub> <sup>*</sup>                    | T <sub>10</sub> GATTCACACCCACACACC-Cy3                                           |
| D <sub>23</sub> <sup>*</sup>                    | T <sub>10</sub> GATTCACACCCACACACCGTCAC-Cy3                                      |
| D <sub>30</sub> <sup>*</sup>                    | T <sub>10</sub> GATTCACACCCACACACCGTCACCATCGAC-Cy3                               |
| D <sub>40</sub> <sup>*</sup>                    | T <sub>10</sub> GATTCACACCCACACACCGTCACCATCGACTCAAGCAATC-Cy3                     |
| S <sub>22</sub> B <sub>18</sub> H <sub>18</sub> | TGGCGACGGCAGCGAGGCGGTGTGTGGGTGTGAATCTCACTAATAAGTTCCGCGGCGG                       |
| S <sub>22</sub> B <sub>23</sub> H <sub>18</sub> | TGGCGACGGCAGCGAGGCGTGACGGTGTGTGGGTGTGAATCTCACTAATAAGTTCCGCGGCGG                  |
| S <sub>22</sub> B <sub>30</sub> H <sub>18</sub> | TGGCGACGGCAGCGAGGCGTCGATGGTGACGGTGTGTGGGTGTGAATCTCACTAATAAGTTCCGCGGCGG           |
| S <sub>22</sub> B <sub>40</sub> H <sub>18</sub> | TGGCGACGGCAGCGAGGCGATTGCTTGAGTCGATGGTGACGGTGTGTGGGTGTGAATCTCACTAATAAGTTCCGCGGCGG |
| B <sub>18</sub> H <sub>18</sub>                 | TGGCGACGGCAGCGAGGCGGTGTGTGGGTGTGAATC                                             |
| B <sub>23</sub> H <sub>18</sub>                 | TGGCGACGGCAGCGAGGCGTGACGGTGTGTGGGTGTGAATC                                        |
| B <sub>30</sub> H <sub>18</sub>                 | TGGCGACGGCAGCGAGGCGTCGATGGTGACGGTGTGTGGGTGTGAATC                                 |
| B <sub>40</sub> H <sub>18</sub>                 | TGGCGACGGCAGCGAGGCGATTGCTTGAGTCGATGGTGACGGTGTGTGGGTGTGAATC                       |
| T <sub>22</sub> B <sub>30</sub> H <sub>18</sub> | TGGCGACGGCAGCGAGGCGTCGATGGTGACGGTGTGTGGGTGTGAATCT <sub>22</sub>                  |
| T <sub>10</sub> B <sub>30</sub> H <sub>18</sub> | TGGCGACGGCAGCGAGGCGTCGATGGTGACGGTGTGTGGGTGTGAATCT <sub>10</sub>                  |
| T <sub>10</sub> B <sub>23</sub> H <sub>18</sub> | TGGCGACGGCAGCGAGGCGTGACGGTGTGTGGGTGTGAATCT <sub>10</sub>                         |
| T <sub>5</sub> B <sub>30</sub> H <sub>18</sub>  | TGGCGACGGCAGCGAGGCGTCGATGGTGACGGTGTGTGGGTGTGAATCT <sub>5</sub>                   |
| S <sub>16</sub> B <sub>30</sub> H <sub>18</sub> | TGGCGACGGCAGCGAGGCGTCGATGGTGACGGTGTGTGGGTGTGAATCTCACTAATAAGTTCCG                 |
| S <sub>10</sub> B <sub>30</sub> H <sub>18</sub> | TGGCGACGGCAGCGAGGCGTCGATGGTGACGGTGTGTGGGTGTGAATCTCACTAATAA                       |
| S <sub>10</sub> B <sub>23</sub> H <sub>18</sub> | TGGCGACGGCAGCGAGGCGTGACGGTGTGTGGGTGTGAATCTCACTAATAA                              |
| S <sub>5</sub> B <sub>30</sub> H <sub>18</sub>  | TGGCGACGGCAGCGAGGCGTCGATGGTGACGGTGTGTGGGTGTGAATCTCACT                            |
| R <sub>18</sub> H <sub>18</sub>                 | TGGCGACGGCAGCGAGGCrGrGrUrGrUrGrUrGrUrGrUrGrUrGrUrGrArArUrC                       |

**Table S2.** Substrates used in this work.

|                                                                                     | Oligonucleotides (Table S1)                                                                                                                                                                                                          | Figure                      |
|-------------------------------------------------------------------------------------|--------------------------------------------------------------------------------------------------------------------------------------------------------------------------------------------------------------------------------------|-----------------------------|
| 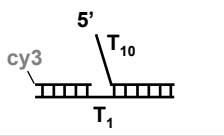   | $P + T_1 + D_{23}$                                                                                                                                                                                                                   | 1, 2a                       |
|    | $P + T_2 + C_{23}^* + H_{18}^*$                                                                                                                                                                                                      | 2c                          |
|    | $L_{18}: P + S_{22}B_{18}H_{18} + D_{18}^* + H_{18}^*$<br>$L_{23}: P + S_{22}B_{23}H_{18} + D_{23}^* + H_{18}^*$<br>$L_{30}: P + S_{22}B_{30}H_{18} + D_{30}^* + H_{18}^*$<br>$L_{40}: P + S_{22}B_{40}H_{18} + D_{40}^* + H_{18}^*$ | S2, 3                       |
|    | $L_{18}: S_{22}B_{18}H_{18} + D_{18}^* + H_{18}^*$<br>$L_{23}: S_{22}B_{23}H_{18} + D_{23}^* + H_{18}^*$<br>$L_{30}: S_{22}B_{30}H_{18} + D_{30}^* + H_{18}^*$<br>$L_{40}: S_{22}B_{40}H_{18} + D_{40}^* + H_{18}^*$                 | 2d, 3, 4, 6b,<br>S3, S4, S6 |
|   | $L_{18}: B_{18}H_{18} + D_{18}^* + H_{18}^*$<br>$L_{23}: B_{23}H_{18} + D_{23}^* + H_{18}^*$<br>$L_{30}: B_{30}H_{18} + D_{30}^* + H_{18}^*$<br>$L_{40}: B_{40}H_{18} + D_{40}^* + H_{18}^*$                                         | 3, 7b, S7                   |
|  | $SS_{16}: S_{16}B_{30}H_{18} + D_{30}^* + H_{18}^*$<br>$SS_{10}: S_{10}B_{30}H_{18} + D_{30}^* + H_{18}^*$<br>$SS_5: S_5B_{30}H_{18} + D_{30}^* + H_{18}^*$                                                                          | 5, 6a, 7a,<br>S3, S4b       |
|  | $T_{22}: T_{22}B_{30}H_{18} + D_{30}^* + H_{18}^*$<br>$T_{10}: T_{10}B_{30}H_{18} + D_{30}^* + H_{18}^*$<br>$T_5: T_5B_{30}H_{18} + D_{30}^* + H_{18}^*$                                                                             | 5, 6a, 7a,<br>S3a, S4b      |
|  | $L_{23}: S_{10}B_{23}H_{18} + D_{23}^* + H_{18}^*$<br>$L_{30}: S_{10}B_{30}H_{18} + D_{30}^* + H_{18}^*$                                                                                                                             | 5b                          |
|  | $L_{23}: T_{10}B_{23}H_{18} + D_{23}^* + H_{18}^*$<br>$L_{30}: T_{10}B_{30}H_{18} + D_{30}^* + H_{18}^*$                                                                                                                             | 5b, S4b                     |
|  | $R_{18}H_{18} + D_{18}^* + H_{18}^*$                                                                                                                                                                                                 | S7                          |

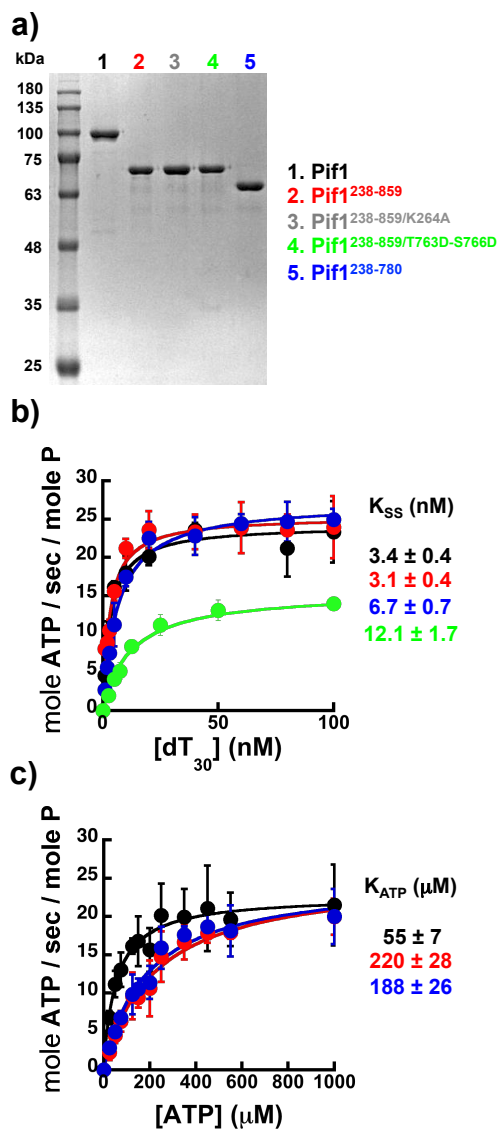

**Figure S1. a)** SDS-PAGE of the different Pif1 constructs stained with Coomassie. **b,c)** ATPase activity of the different Pif1 constructs as function of ssDNA or ATP concentration using an NADH-coupled assay. The experimental conditions used are the same as the ones used to monitor unwinding activity (see main text).

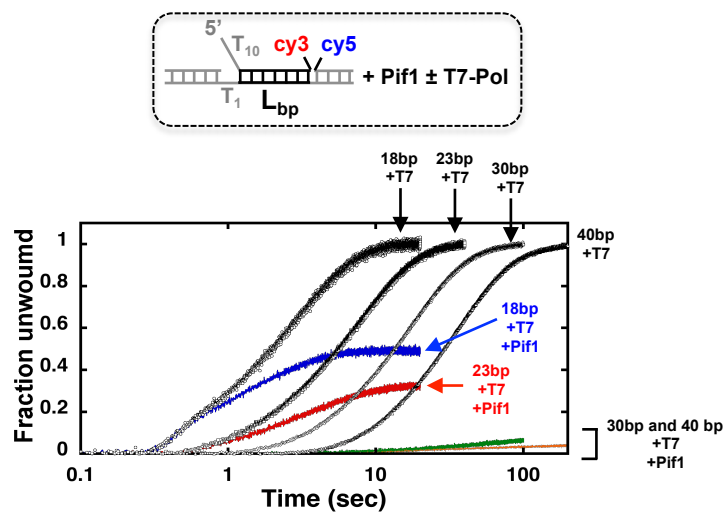

**Figure S2.** Stopped-flow FRET-based assay with DNA containing 5'-dT<sub>10</sub> flap and different lengths of the dsDNA region to be strand displaced/unwound. The reactions were started by mixing 100 mM dNTPs and pre-formed complexes of 20 nM DNA with 15 nM Pif1 in the absence or presence of 20 nM T7-Pol (all concentrations are after mixing).

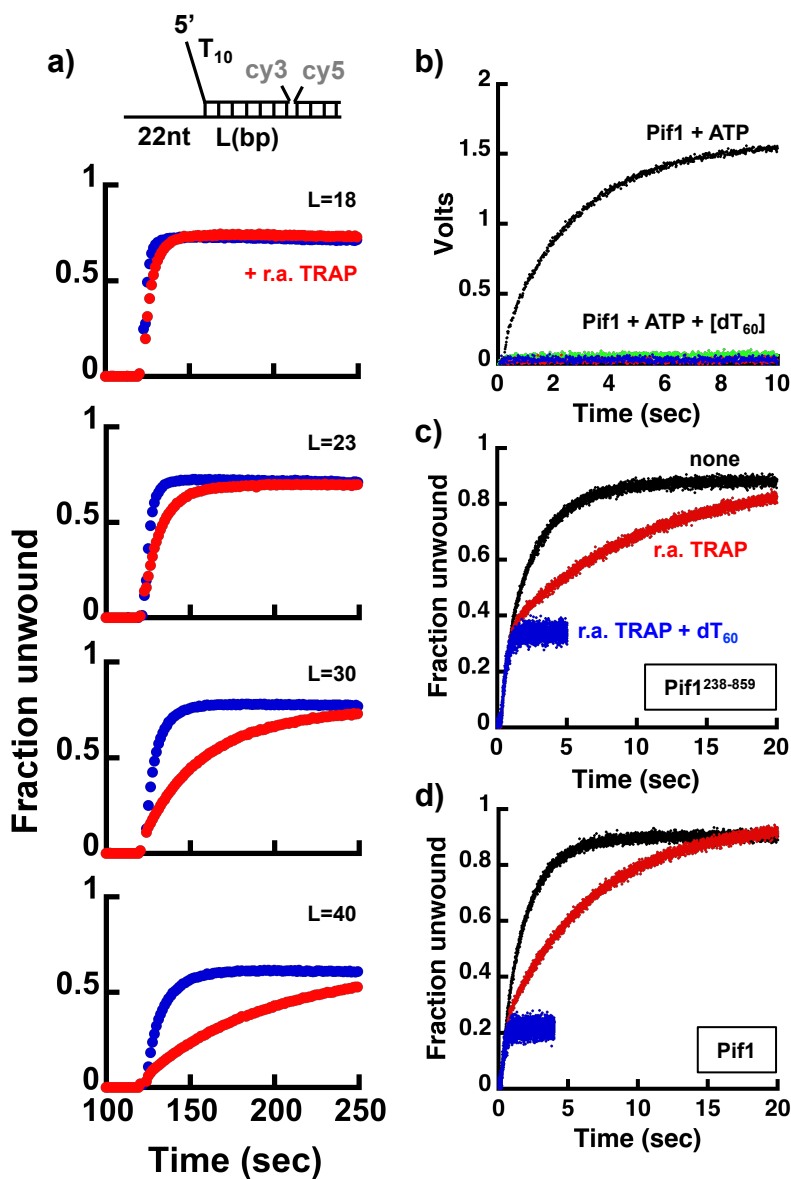

**Figure S3.** **a)** Same experiments as in Figure 3, panels 5-8 (see main text) but performed with full-length Pif1. **b)** Efficacy of dT<sub>60</sub> as a protein trap. Stopped-flow FRET-based unwinding experiments were performed by mixing 15nM Pif1 either with 0.5 ATP or with 0.5mM ATP and 100-1000nM of dT<sub>60</sub>. **c,d)** Expanded time scale for the data shown in Figure 4c and 4f in the main text.

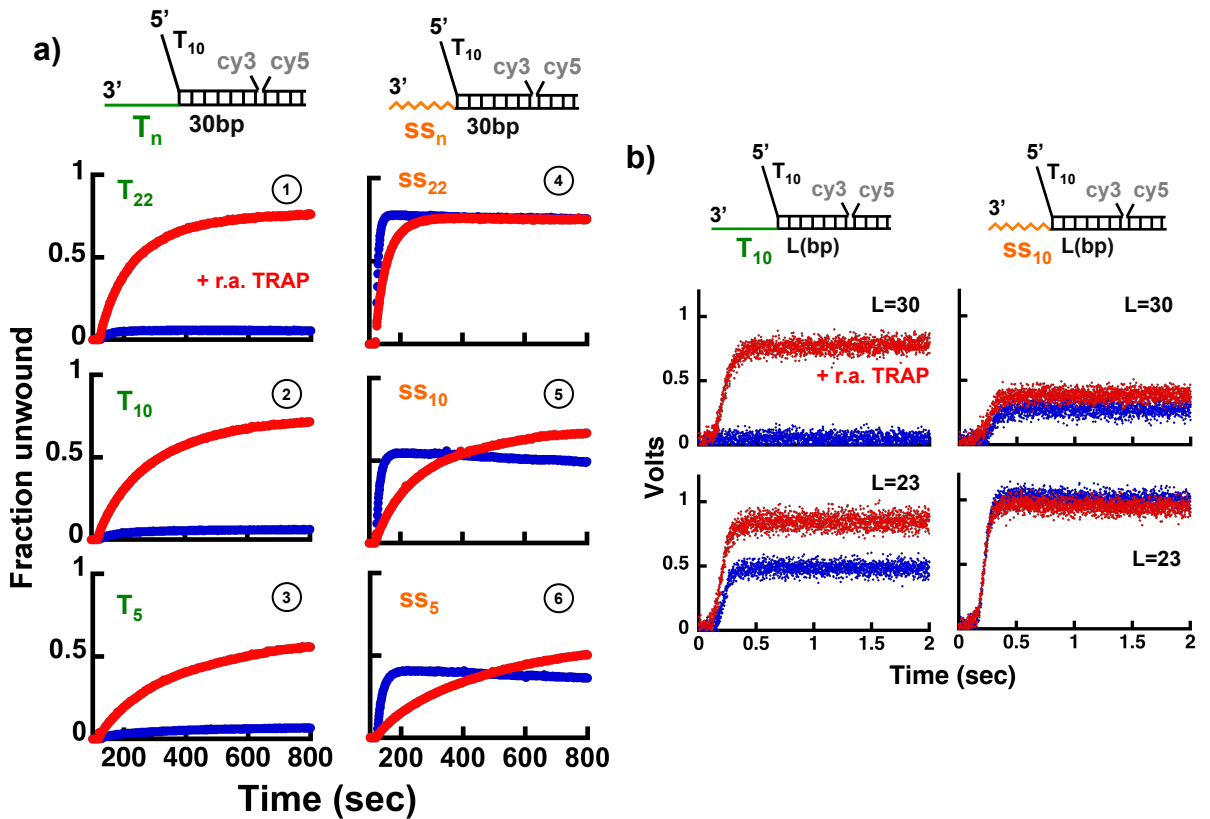

**Figure S4. a)** Same experiments as in Figure 5a in the main text but using full-length Pif1. **b)** Experiments as in Figure 5b in the main text performed with full-length Pif1.

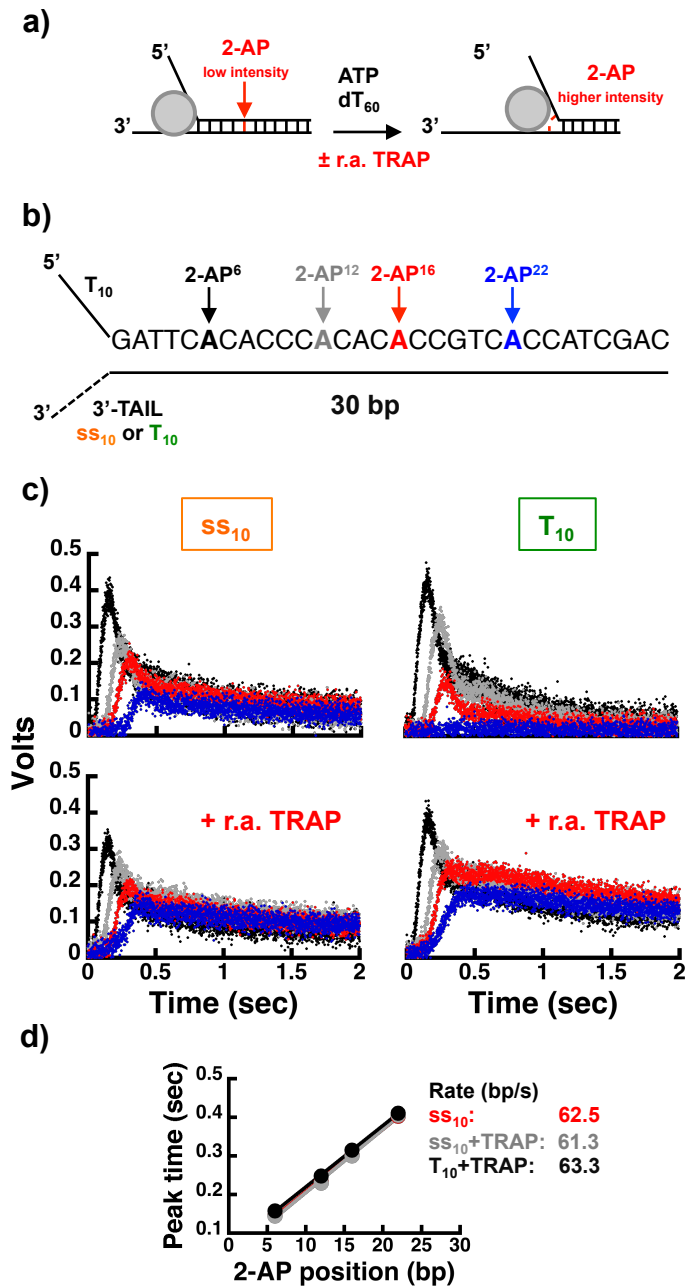

**Figure S5.** **a)** Schematic of the experiment to monitor opening of a base-pair carrying a 2-aminopurine modified base. **b)** Strands carrying the 2-AP modification at either the 6<sup>th</sup>, 12<sup>th</sup>, 16<sup>th</sup> or 22<sup>nd</sup> position were annealed to the complementary strand containing a T10 or a 10 nt 3'tail. **c)** Single turnover experiments with the different 2-AP modified substrates (color coded according to b)) were performed in the absence or presence of the trap to prevent re-annealing. **d)** The rate of unwinding calculated from the peak time in the 2-AP signal is similar to the one determined in Figure 4.

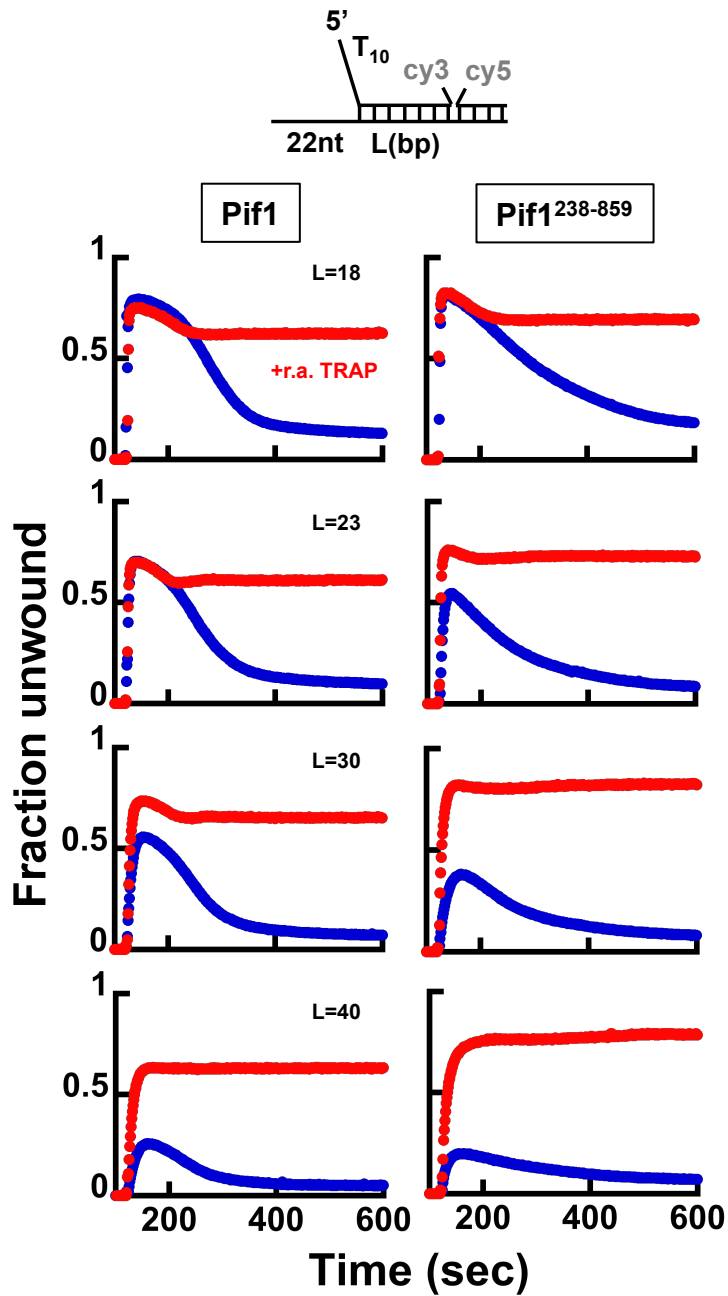

**Figure S6.** Multiple-turnover FRET-based unwinding experiments using 20nM of the indicate substrates and 200nM of either full-length Pif1 (left panels) or Pif1<sup>238-859</sup> (right panels). The reactions were started as discussed in the main text.



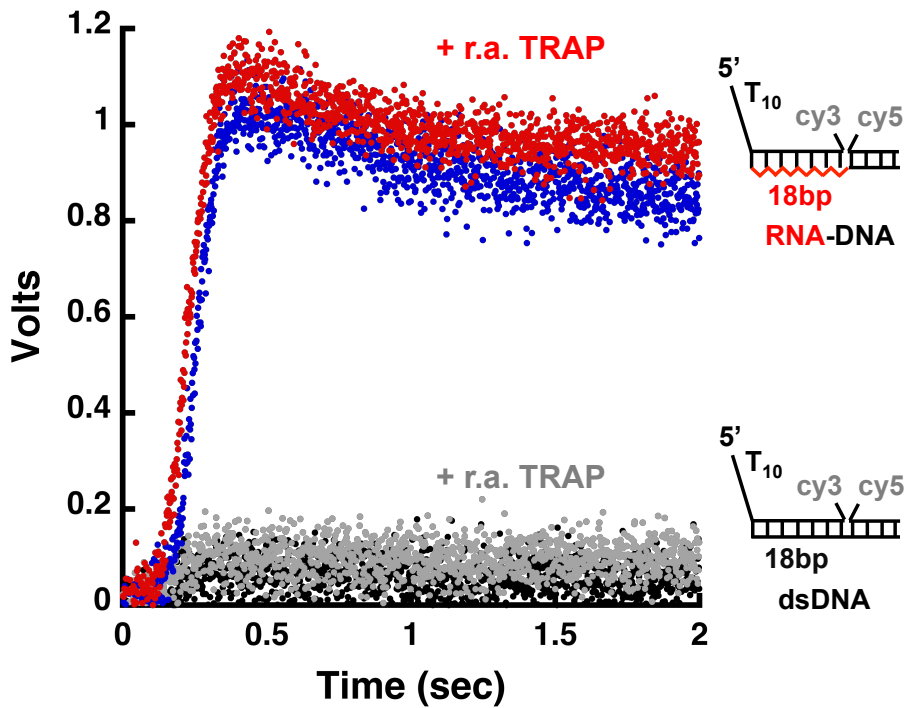

**Figure S7.** Stopped-flow FRET-based unwinding experiments under single-turnover conditions using 20nM of the indicate substrates and 15nM of Pif1<sup>238-859</sup>. The reactions were started by addition of either 0.5mM ATP + 0.5mM dT<sub>60</sub> (blue or black) or 0.5mM ATP + 0.5mM dT60 + 3.5x of the r.a. TRAP (red or gray).
